# Supplementary material
Source: bioRxiv or medRxiv preprint supplement (https://www.biorxiv.org/highwire/filestream/36440/field_highwire_adjunct_files/4/124396-5.pdf)
Supplement: Supplementary file [file 124396-5.pdf]

## Supplementary dataset S4: Composite model summary (including individual models).

| REMINDER: $TWG = 1/3 \times n \times \text{height} \times (\text{diameter}/2)^2 \times \text{wood density} \times \text{glucose release}$ |                                                                  |        |                                                     |            |                                                                                                                              |          |                                                  |        |
|-------------------------------------------------------------------------------------------------------------------------------------------|------------------------------------------------------------------|--------|-----------------------------------------------------|------------|------------------------------------------------------------------------------------------------------------------------------|----------|--------------------------------------------------|--------|
| <b>COMBINED MODEL FOR TWG</b>                                                                                                             |                                                                  |        |                                                     |            |                                                                                                                              |          |                                                  |        |
| <b>R2</b>                                                                                                                                 |                                                                  | 0.80   |                                                     |            |                                                                                                                              |          |                                                  |        |
| <b>Q2</b>                                                                                                                                 |                                                                  | 0.80   |                                                     |            |                                                                                                                              |          |                                                  |        |
| <b>Selected models to build the composite model for predicting TWG</b>                                                                    |                                                                  |        |                                                     |            |                                                                                                                              |          |                                                  |        |
|                                                                                                                                           | Glucose release after pre-treatment (g.g-1)<br>(Model type: GAM) |        | Wood density (g.mm-3)<br>(Model type: Linear Model) |            | Stem height (mm)<br>(Model type: Linear Model)                                                                               |          | Stem diameter (mm)<br>(Model type: Linear Model) |        |
| <b>R2</b>                                                                                                                                 | 0.79                                                             |        | 0.81                                                |            | 0.99                                                                                                                         |          | 0.85                                             |        |
| <b>Q2</b>                                                                                                                                 | 0.49                                                             |        | 0.77                                                |            | 0.51                                                                                                                         |          | 0.69                                             |        |
| Variables / importance*                                                                                                                   | ARAtms (smooth)                                                  | 3.632  | GLCtms                                              | -0.0000193 | ARAtms                                                                                                                       | -860.25  | ARAtms                                           | -4.6   |
|                                                                                                                                           | RHAtms (linear)                                                  | -0.753 | FibRadDiam                                          | -0.0000287 | FUCTms                                                                                                                       | -8070.78 | RHAtms                                           | -3.7   |
|                                                                                                                                           | GALtms (linear)                                                  | 0.059  | Wall thickness                                      | 0.000331   | XYLtms                                                                                                                       | -100.78  | XYLtms                                           | -0.51  |
|                                                                                                                                           | SG (linear)                                                      | 0.134  | Intercept (if any):                                 | 0.00055    | 4-O-MeGlcAtms                                                                                                                | -182.37  | MANtms                                           | -0.74  |
|                                                                                                                                           | FibTanDiam (smooth)                                              | 2.527  |                                                     |            | GLCtms                                                                                                                       | -84.69   | 4-O-MeGlcAtms                                    | -1.18  |
|                                                                                                                                           | FibArea (linear)                                                 | 0.006  |                                                     |            | G                                                                                                                            | 452.38   | GLCtms                                           | -0.44  |
|                                                                                                                                           | MOE Gpa (smooth)                                                 | 1.529  |                                                     |            | S                                                                                                                            | 359.28   | SG                                               | -1.27  |
|                                                                                                                                           | Intercept (if any):                                              | -2.559 |                                                     |            | H                                                                                                                            | 237.92   | CL                                               | 31.72  |
|                                                                                                                                           |                                                                  |        |                                                     |            | P                                                                                                                            | 540.62   | L                                                | 1.73   |
|                                                                                                                                           |                                                                  |        |                                                     |            | CL                                                                                                                           | 6481.88  | Wall thickness                                   | -1.63  |
|                                                                                                                                           |                                                                  |        |                                                     |            | FibFrac                                                                                                                      | 12310.91 | Intercept (if any):                              | -41.11 |
|                                                                                                                                           |                                                                  |        |                                                     |            | FibPop                                                                                                                       | -4.63    |                                                  |        |
|                                                                                                                                           |                                                                  |        |                                                     |            | FibArea                                                                                                                      | -35.39   |                                                  |        |
|                                                                                                                                           |                                                                  |        |                                                     |            | Intercept (if any):                                                                                                          | 0        |                                                  |        |
| Other information                                                                                                                         | Family: gamma                                                    |        |                                                     |            | The intercept was set to 0 by the user because the algorithm tended to overblow the importance of the intercept by returning |          |                                                  |        |
|                                                                                                                                           | Link function: log                                               |        |                                                     |            |                                                                                                                              |          |                                                  |        |
|                                                                                                                                           | gamma = 1                                                        |        |                                                     |            |                                                                                                                              |          |                                                  |        |

\* Coefficient for Linear Model and for linear terms in GAMs, number of degrees of freedom for smooth terms in GAM.

Orange color indicates that this trait affects both saccharification and biomass production.
